# Supplementary material
Source: publisher figshare collection journal article supplement (https://springernature.figshare.com/ndownloader/files/9102106)

Figure S01

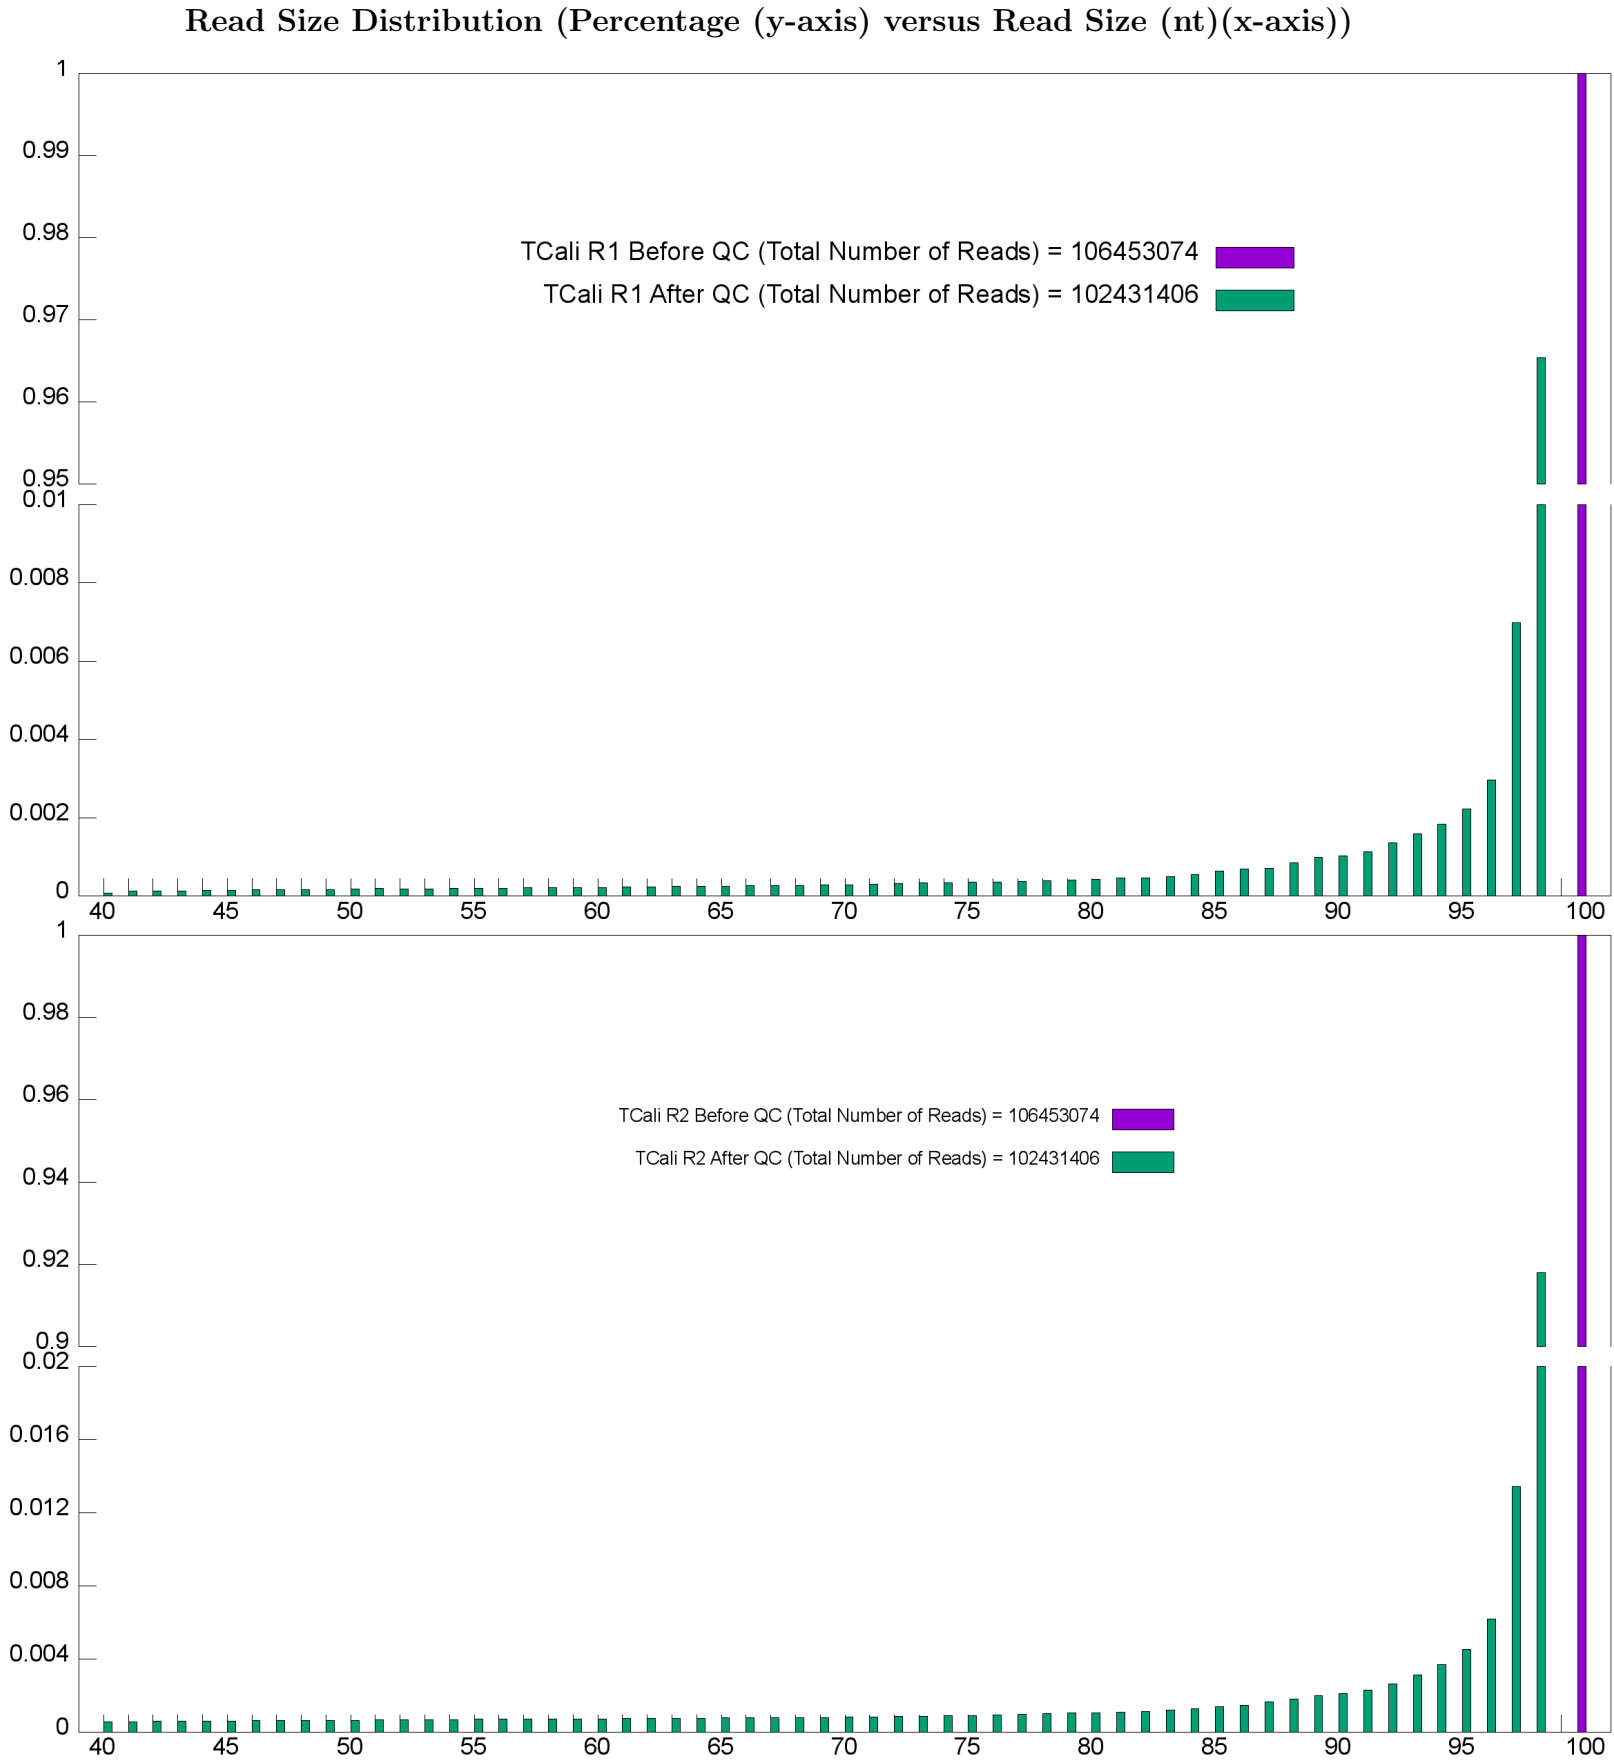

Figure S02: Full Length Transcript Analysis Against Uniprot\_Sprot

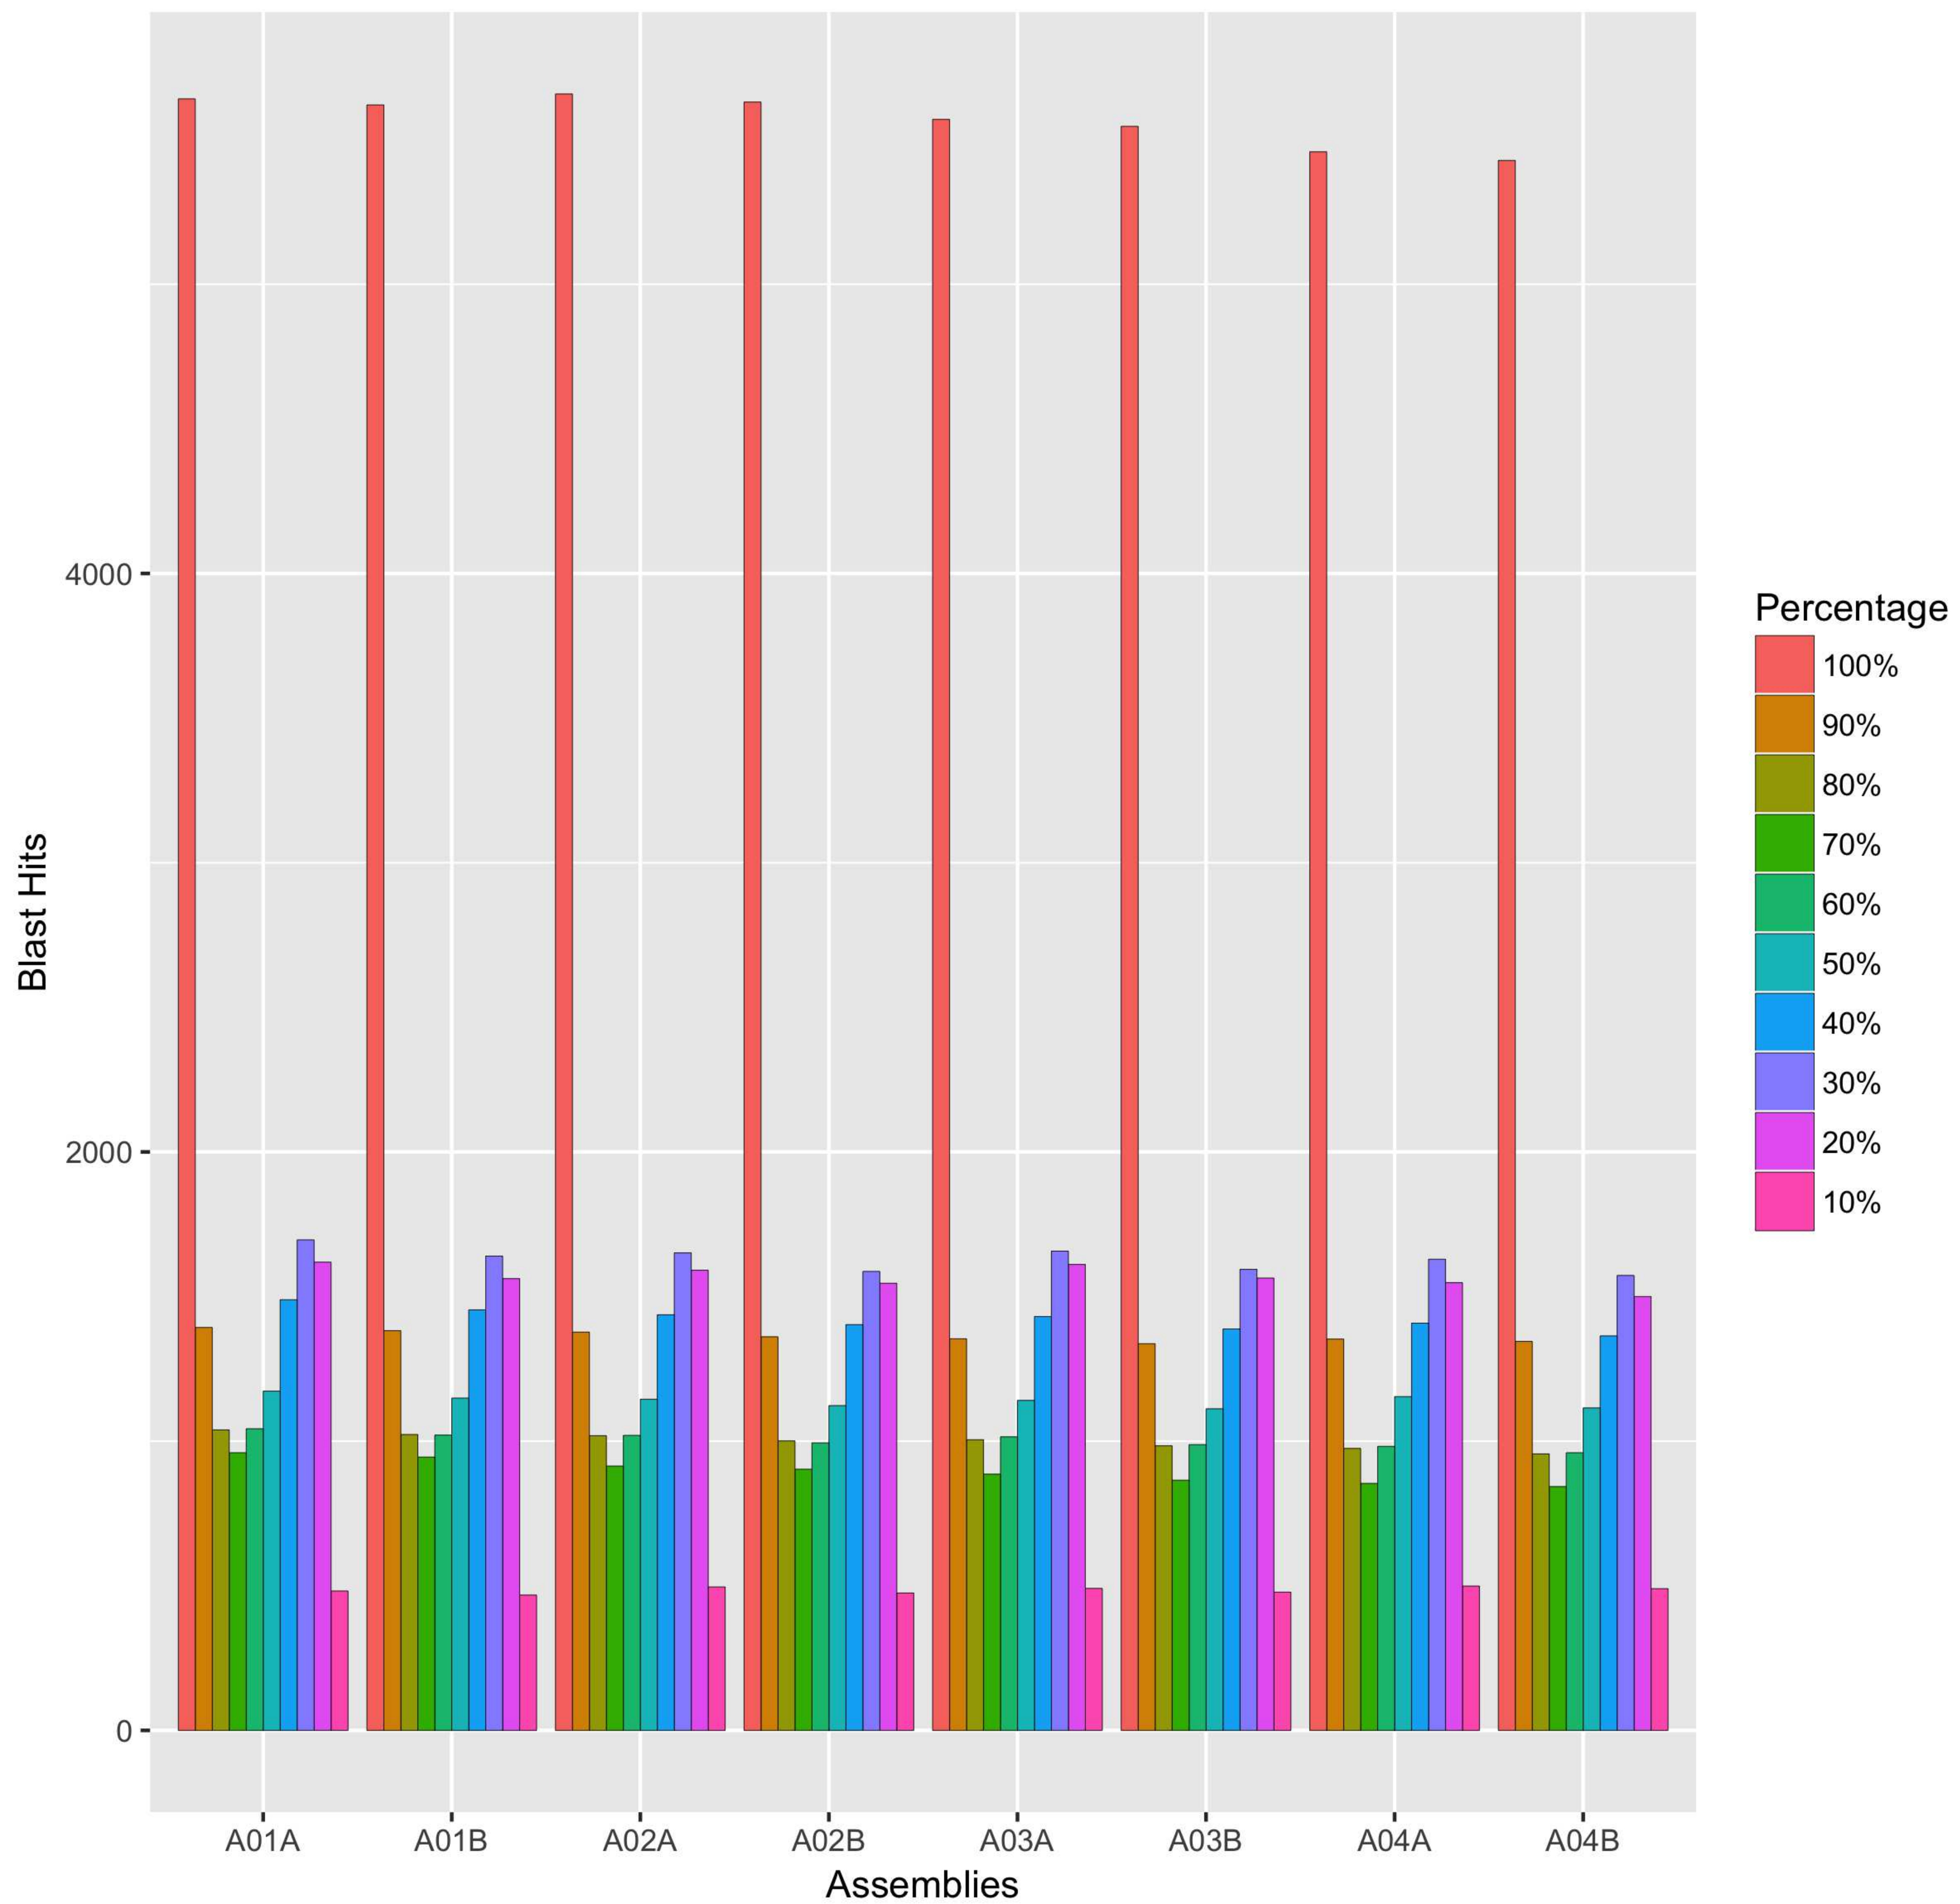

Supplement: Supplementary file [file 9102106]
